# Supplementary material for: Overexpression of HvIcy6 in Barley Enhances Resistance against Tetranychus urticae and Entails Partial Transcriptomic Reprogramming
Source: MDPI journal article supplement (doi:10.3390/ijms19030697), 2018-03-01
Supplement: s1 [file s1]

(a)

| Construct      | Event | Number of lines analysed | Selected lines |
|----------------|-------|--------------------------|----------------|
| OE <i>Icy6</i> | E01   | 5                        | 1019, 1048     |
|                | E02   | 15                       | 1082, 1085     |

(b)

| Line | $2^{-\Delta\Delta C_t} \pm CV$ | CN |
|------|--------------------------------|----|
| WT   | $1.12 \pm 0.11$                | 1  |
| 1019 | $2.12 \pm 0.19$                | 2  |
| 1048 | $6.25 \pm 0.06$                | 6  |
| 1082 | $1.81 \pm 0.03$                | 2  |
| 1085 | $1.94 \pm 0.08$                | 2  |

(c)

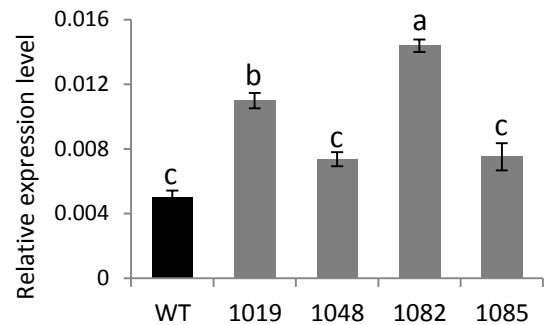

(d)

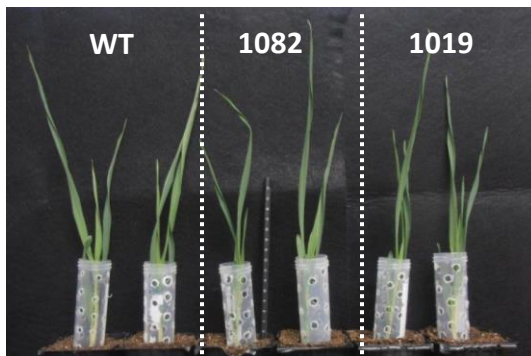

(e)

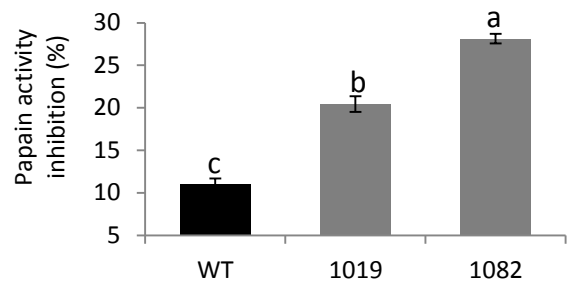

**Figure S1.** Characterization of overexpressing *HvIcy6* transgenic homozygous barley lines. **(a)** Number of independent homozygous lines per transformation event and selected lines used for molecular characterization. **(b)** Estimation of transgene copy number by qRT-PCR assays coupled to the  $2^{-\Delta\Delta C_t}$  method. Values are expressed as the average  $\pm$  coefficient of variation (CV) of triplicate measurements. *Hv4hppd* and *cyclophilin* genes were used as references for single copy and constitutive expression, respectively. CN: copy number for each group. **(c)** Relative expression levels of the *HvIcy6* gene in transgenic barley lines assessed by qRT-PCR and normalized to barley *cyclophilin* mRNA content. **(d)** Phenotypic aspect of the plants at ten days of development. **(e)** Commercial papain inhibitory capacity of leaf extracts expressed as percentage of inhibition of papain activity. Different letters indicate significant differences ( $P < 0.05$ , One-Way ANOVA Student Newman-Keuls test).
