# Supplementary material for: Overexpression of HvIcy6 in Barley Enhances Resistance against Tetranychus urticae and Entails Partial Transcriptomic Reprogramming
Source: MDPI journal article supplement (doi:10.3390/ijms19030697), 2018-03-01
Supplement: s1 [file s1]

**Table S1.** Differentially expressed genes between overexpressing *HvIcy6* and wild-type plants obtained by Kallisto/Sleuth method (qval<0.01; b>±1).

| target_id           | pval       | qval       | b    | BARLEX                                                               |
|---------------------|------------|------------|------|----------------------------------------------------------------------|
| HORVU3Hr1G070020.1  | 3.12E-37   | 4.50E-34   | 5,75 | <b>Cysteine proteinase inhibitor 8 (HvCPI-6)</b>                     |
| HORVU4Hr1G052030.1  | 2.25E-61   | 1.30E-57   | 5,47 | FAR1-related sequence 5                                              |
| HORVU2Hr1G059080.1  | 7.63E-11   | 8.51E-09   | 4,97 | Tetratricopeptide repeat containing protein                          |
| HORVU4Hr1G085370.1  | 5.62E-22   | 3.33E-19   | 4,50 | MADS-box transcription factor family protein                         |
| HORVU6Hr1G049800.1  | 4.58E-21   | 2.52E-18   | 4,49 | cell division cycle 48                                               |
| HORVU3Hr1G044780.1  | 4.66E-05   | 0.00120049 | 4,44 | Protein transport protein SEC23-1                                    |
| HORVU7Hr1G068560.10 | 3.80E-53   | 1.76E-49   | 4,42 | Ubiquitin-like-specific protease 1A                                  |
| HORVU4Hr1G090490.2  | 4.38E-17   | 1.44E-14   | 4,01 | Ulp1 protease family, C-terminal catalytic domain containing protein |
| HORVU3Hr1G043690.1  | 5.87E-06   | 0.00020713 | 3,79 | HEAT repeat-containing protein                                       |
| HORVU1Hr1G049390.2  | 4.27E-14   | 8.88E-12   | 3,79 | undescribed protein                                                  |
| HORVU4Hr1G014520.1  | 4.73E-06   | 0.00017293 | 3,62 | unknown function                                                     |
| HORVU7Hr1G109020.9  | 2.20E-06   | 8.88E-05   | 3,56 | Cortical cell-delineating protein                                    |
| HORVU4Hr1G041260.1  | 9.37E-13   | 1.64E-10   | 3,56 | undescribed protein                                                  |
| HORVU4Hr1G029140.1  | 0.00042663 | 0.00772811 | 3,45 | Ulp1 protease family, C-terminal catalytic domain containing protein |
| HORVU1Hr1G008830.2  | 4.63E-05   | 0.00119411 | 3,42 | unknown function                                                     |
| HORVU2Hr1G033300.1  | 5.01E-06   | 0.00018173 | 3,42 | Ulp1 protease family, C-terminal catalytic domain containing protein |
| HORVU7Hr1G093410.1  | 2.38E-10   | 2.39E-08   | 3,36 | unknown function                                                     |
| HORVU1Hr1G008840.3  | 4.76E-17   | 1.53E-14   | 3,17 | unknown function                                                     |
| HORVU3Hr1G117780.1  | 2.51E-25   | 1.87E-22   | 3,15 | Chromosome 3B, genomic scaffold, cultivar Chinese Spring             |
| HORVU5Hr1G041210.2  | 4.11E-07   | 2.03E-05   | 3,14 | receptor-like kinase 1                                               |
| HORVU2Hr1G093530.3  | 0.00055329 | 0.00959363 | 3,05 | Chromosome 3B, genomic scaffold, cultivar Chinese Spring             |
| HORVU3Hr1G044170.1  | 9.54E-07   | 4.23E-05   | 3,04 | Ulp1 protease family, C-terminal catalytic domain containing protein |
| HORVU6Hr1G067630.1  | 0.00036644 | 0.00679391 | 2,99 | AAA-type ATPase family protein                                       |
| HORVU4Hr1G028400.1  | 0.00023509 | 0.00473797 | 2,87 | G-type lectin S-receptor-like serine/threonine-protein kinase        |
| HORVU2Hr1G003920.1  | 5.60E-05   | 0.00139753 | 2,75 | Phytosulfokine receptor 2                                            |
| HORVU0Hr1G014630.8  | 1.27E-06   | 5.51E-05   | 2,72 | Protein kinase superfamily protein                                   |
| HORVU6Hr1G093140.1  | 6.84E-05   | 0.00165859 | 2,63 | receptor-like protein kinase 1                                       |
| HORVU4Hr1G076610.1  | 3.00E-10   | 2.94E-08   | 2,46 | unknown function                                                     |
| HORVU5Hr1G070660.1  | 7.83E-05   | 0.00184389 | 2,28 | undescribed protein                                                  |
| HORVU1Hr1G082310.1  | 7.88E-11   | 8.75E-09   | 2,22 | Ethylene-responsive transcription factor 4                           |
| HORVU0Hr1G002410.1  | 2.22E-07   | 1.16E-05   | 2,16 | unknown function                                                     |
| HORVU0Hr1G002390.1  | 0.00020488 | 0.0042362  | 2,01 | unknown function                                                     |
| HORVU3Hr1G056980.2  | 6.34E-05   | 0.00155235 | 1,80 | myb domain protein 112                                               |
| HORVU1Hr1G008900.2  | 0.00032373 | 0.0061285  | 1,72 | Chromosome 3B, genomic scaffold, cultivar Chinese Spring             |
| HORVU1Hr1G070250.2  | 1.63E-14   | 3.85E-12   | 1,63 | WRKY DNA-binding protein 33                                          |
| HORVU1Hr1G019410.1  | 2.93E-06   | 0.00011318 | 1,58 | HXXXD-type acyl-transferase family protein                           |
| HORVU7Hr1G092530.27 | 2.31E-06   | 9.24E-05   | 1,57 | diacylglycerol kinase 5                                              |

|                     |            |            |      |                                                                          |
|---------------------|------------|------------|------|--------------------------------------------------------------------------|
| HORVU1Hr1G090720.1  | 2.23E-06   | 8.96E-05   | 1,54 | malate dehydrogenase                                                     |
| HORVU6Hr1G080340.11 | 2.45E-06   | 9.70E-05   | 1,51 | Ethylene-responsive transcription factor 5                               |
| HORVU2Hr1G093140.1  | 6.56E-19   | 2.66E-16   | 1,50 | alpha/beta-Hydrolases superfamily protein                                |
| HORVU4Hr1G010770.2  | 8.61E-06   | 0.00028735 | 1,50 | unknown function                                                         |
| HORVU3Hr1G086230.4  | 3.47E-10   | 3.35E-08   | 1,50 | Calcium-dependent lipid-binding (CaLB domain) family protein             |
| HORVU7Hr1G101790.1  | 4.84E-11   | 5.59E-09   | 1,45 | Calcium-binding EF-hand family protein                                   |
| HORVU7Hr1G006600.3  | 0.00045122 | 0.00811335 | 1,44 | Chromosome 3B, genomic scaffold, cultivar Chinese Spring                 |
| HORVU5Hr1G113950.1  | 1.83E-23   | 1.25E-20   | 1,43 | DCD (Development and Cell Death) domain protein                          |
| HORVU7Hr1G041300.1  | 2.31E-05   | 0.00066144 | 1,42 | Protein TIFY 11e                                                         |
| HORVU4Hr1G089510.3  | 3.27E-05   | 0.0008857  | 1,40 | beta-amylase 5                                                           |
| HORVU4Hr1G025180.1  | 3.31E-06   | 0.00012609 | 1,40 | Cytochrome P450 superfamily protein                                      |
| HORVU5Hr1G072770.1  | 1.71E-17   | 5.81E-15   | 1,39 | undescribed protein                                                      |
| HORVU6Hr1G067740.3  | 7.32E-07   | 3.34E-05   | 1,39 | Protein NRT1/ PTR FAMILY 8.3                                             |
| HORVU5Hr1G034830.3  | 7.33E-05   | 0.0017542  | 1,38 | WRKY family transcription factor                                         |
| HORVU6Hr1G013700.1  | 8.46E-11   | 9.35E-09   | 1,36 | GDSL esterase/lipase                                                     |
| HORVU5Hr1G113840.2  | 6.78E-06   | 0.00023465 | 1,35 | Pentatricopeptide repeat-containing protein                              |
| HORVU4Hr1G056210.7  | 1.87E-05   | 0.00055431 | 1,33 | Protein phosphatase 2C family protein                                    |
| HORVU2Hr1G034280.2  | 5.39E-07   | 2.57E-05   | 1,32 | Lipid transfer protein                                                   |
| HORVU2Hr1G024740.2  | 0.00032195 | 0.00611495 | 1,31 | Hexosyltransferase                                                       |
| HORVU6Hr1G032750.2  | 0.00034853 | 0.00653441 | 1,29 | Protein SCAI                                                             |
| HORVU7Hr1G082360.1  | 9.09E-07   | 4.04E-05   | 1,28 | UDP-Glycosyltransferase superfamily protein                              |
| HORVU5Hr1G123970.5  | 7.12E-08   | 4.25E-06   | 1,27 | Beta-fructofuranosidase, insoluble isoenzyme 4                           |
| HORVU7Hr1G101740.2  | 1.30E-06   | 5.62E-05   | 1,25 | Calcium-binding EF-hand family protein                                   |
| HORVU4Hr1G054770.1  | 2.62E-16   | 7.87E-14   | 1,25 | COBRA-like protein 7                                                     |
| HORVU7Hr1G083680.1  | 7.35E-05   | 0.00175629 | 1,23 | undescribed protein                                                      |
| HORVU0Hr1G007790.1  | 7.35E-05   | 0.00175629 | 1,23 | undescribed protein                                                      |
| HORVU2Hr1G002840.4  | 1.56E-23   | 1.09E-20   | 1,22 | receptor-like protein kinase 1                                           |
| HORVU5Hr1G042030.1  | 7.12E-06   | 0.00024469 | 1,22 | Cytochrome P450 superfamily protein                                      |
| HORVU4Hr1G086660.1  | 1.87E-10   | 1.93E-08   | 1,22 | Cyclin-dependent protein kinase inhibitor SMR1                           |
| HORVU2Hr1G123480.1  | 1.59E-11   | 2.10E-09   | 1,21 | CCR4-NOT transcription complex subunit 8                                 |
| HORVU1Hr1G001770.1  | 5.89E-19   | 2.47E-16   | 1,20 | Serine/threonine-protein kinase                                          |
| HORVU6Hr1G019870.1  | 2.42E-07   | 1.25E-05   | 1,20 | F-box-like                                                               |
| HORVU2Hr1G043940.2  | 2.77E-07   | 1.41E-05   | 1,15 | Amyb5                                                                    |
| HORVU4Hr1G075090.1  | 1.89E-14   | 4.33E-12   | 1,14 | unknown function                                                         |
| HORVU3Hr1G070340.3  | 7.41E-16   | 2.11E-13   | 1,14 | Protein-tyrosine phosphatase mitochondrial 1-like protein                |
| HORVU1Hr1G027700.1  | 9.84E-09   | 6.99E-07   | 1,14 | WRKY DNA-binding protein 50                                              |
| HORVU1Hr1G051180.1  | 5.17E-05   | 0.00130751 | 1,14 | S-adenosyl-L-methionine-dependent methyltransferases superfamily protein |
| HORVU1Hr1G043040.1  | 0.00059016 | 0.01011906 | 1,12 | undescribed protein                                                      |
| HORVU2Hr1G044540.1  | 1.11E-11   | 1.58E-09   | 1,12 | glutamate synthase 2                                                     |
| HORVU4Hr1G072560.1  | 1.13E-07   | 6.35E-06   | 1,11 | Blue copper protein                                                      |
| HORVU2Hr1G094090.1  | 4.94E-09   | 3.86E-07   | 1,11 | RING zinc finger protein-like                                            |
| HORVU5Hr1G061930.2  | 1.02E-14   | 2.49E-12   | 1,11 | Cytochrome P450 superfamily protein                                      |
| HORVU1Hr1G095160.1  | 5.27E-05   | 0.00132358 | 1,10 | undescribed protein                                                      |
| HORVU5Hr1G108670.4  | 9.03E-08   | 5.27E-06   | 1,10 | Beta-1,3-galactosyltransferase 15                                        |

|                     |            |            |       |                                                                         |
|---------------------|------------|------------|-------|-------------------------------------------------------------------------|
| HORVU1Hr1G057410.1  | 3.08E-05   | 0.00084862 | 1,09  | calmodulin like 23                                                      |
| HORVU2Hr1G117400.1  | 2.40E-06   | 9.53E-05   | 1,09  | undescribed protein                                                     |
| HORVU3Hr1G052250.1  | 1.15E-08   | 8.07E-07   | 1,09  | Chromosome 3B, genomic scaffold, cultivar Chinese Spring                |
| HORVU7Hr1G055330.1  | 4.33E-17   | 1.44E-14   | 1,08  | rRNA N-glycosidase                                                      |
| HORVU7Hr1G113830.3  | 8.57E-07   | 3.83E-05   | 1,08  | WRKY family transcription factor                                        |
| HORVU3Hr1G056960.2  | 2.11E-32   | 2.43E-29   | 1,07  | Siroheme synthase                                                       |
| HORVU7Hr1G005040.7  | 7.70E-08   | 4.56E-06   | 1,07  | ATP synthase subunit a, chloroplastic                                   |
| HORVU5Hr1G020240.2  | 0.00027077 | 0.00528193 | 1,06  | Cysteine proteinases superfamily protein                                |
| HORVU5Hr1G028460.1  | 4.71E-15   | 1.20E-12   | 1,06  | Plant calmodulin-binding protein-related                                |
| HORVU2Hr1G028720.4  | 2.95E-06   | 0.0001136  | 1,04  | Chymotrypsin inhibitor                                                  |
| HORVU4Hr1G076820.1  | 2.19E-15   | 5.81E-13   | 1,04  | ZIM motif family protein                                                |
| HORVU5Hr1G097500.3  | 3.57E-05   | 0.000957   | 1,03  | Zinc finger protein 1                                                   |
| HORVU2Hr1G027080.5  | 5.32E-39   | 8.78E-36   | 1,03  | serine/threonine protein kinase 1                                       |
| HORVU3Hr1G095240.6  | 3.77E-08   | 2.42E-06   | 1,03  | MADS-box transcription factor family protein                            |
| HORVU2Hr1G034480.1  | 0.00054751 | 0.00951494 | 1,03  | Formin Homology 14                                                      |
| HORVU7Hr1G071280.1  | 1.90E-20   | 8.93E-18   | 1,01  | Calcium-dependent protein kinase 2                                      |
| HORVU5Hr1G043630.1  | 1.45E-05   | 0.00044368 | 1,00  | undescribed protein                                                     |
| HORVU5Hr1G068110.1  | 1.18E-08   | 8.29E-07   | 1,00  | basic helix-loop-helix (bHLH) DNA-binding superfamily protein           |
| HORVU2Hr1G041590.1  | 6.04E-19   | 2.49E-16   | -1,01 | equilibrative nucleoside transporter 6                                  |
| HORVU4Hr1G016280.4  | 1.14E-06   | 4.99E-05   | -1,05 | Dimerizations protein, putative                                         |
| HORVU0Hr1G036870.1  | 1.69E-13   | 3.29E-11   | -1,06 | Ribulose biphosphate carboxylase large chain                            |
| HORVU6Hr1G068980.2  | 0.00051113 | 0.00899659 | -1,09 | Transcription factor bHLH63                                             |
| HORVU3Hr1G078760.1  | 0.00010582 | 0.00240077 | -1,11 | Cytochrome P450 superfamily protein                                     |
| HORVU7Hr1G064960.1  | 0.00044899 | 0.0080825  | -1,13 | unknown function                                                        |
| HORVU0Hr1G021860.4  | 0.00021671 | 0.00445543 | -1,14 | Eukaryotic aspartyl protease family protein                             |
| HORVU3Hr1G004790.1  | 5.09E-05   | 0.00129255 | -1,36 | Photosystem II protein D1                                               |
| HORVU5Hr1G080300.1  | 1.42E-17   | 4.90E-15   | -1,43 | Dehydration-responsive element-binding protein 1B                       |
| HORVU0Hr1G026090.1  | 9.54E-09   | 6.82E-07   | -1,47 | Ribulose biphosphate carboxylase large chain                            |
| HORVU6Hr1G060870.3  | 7.05E-21   | 3.62E-18   | -1,48 | Reticulon-like protein                                                  |
| HORVU5Hr1G011540.3  | 6.34E-10   | 5.86E-08   | -1,49 | 2-oxoglutarate (2OG) and Fe(II)-dependent oxygenase superfamily protein |
| HORVU5Hr1G033540.1  | 3.09E-08   | 2.01E-06   | -1,58 | ribulose biphosphate carboxylase small chain 1A                         |
| HORVU6Hr1G059800.2  | 5.89E-21   | 3.16E-18   | -1,92 | Beta-1,3-galactosyltransferase 15                                       |
| HORVU0Hr1G038320.7  | 1.37E-10   | 1.44E-08   | -1,94 | Prolyl endopeptidase                                                    |
| HORVU3Hr1G055420.24 | 9.70E-06   | 0.0003179  | -2,21 | XH/XS domain-containing protein                                         |
| HORVU4Hr1G087340.1  | 1.98E-07   | 1.05E-05   | -2,31 | 60 kDa jasmonate-induced protein                                        |
| HORVU2Hr1G019910.1  | 1.33E-05   | 0.00041484 | -2,62 | flowering promoting factor 1                                            |
| HORVU3Hr1G079180.2  | 2.05E-07   | 1.08E-05   | -3,06 | sigma factor binding protein 1                                          |
| HORVU6Hr1G062860.1  | 0.00025654 | 0.0050924  | -4,36 | amino acid transporter 1                                                |
| HORVU3Hr1G114390.2  | 0.00033948 | 0.00637969 | -4,94 | Pentatricopeptide repeat-containing protein                             |
| HORVU6Hr1G018030.1  | 7.67E-27   | 6.81E-24   | -4,96 | Chromosome 3B, genomic scaffold, cultivar Chinese Spring                |
| HORVU2Hr1G044560.1  | 1.43E-61   | 1.10E-57   | -5,55 | Ferredoxin-dependent glutamate synthase 2                               |
| HORVU5Hr1G054000.1  | 2.23E-50   | 7.34E-47   | -6,10 | Chlorophyll a-b binding protein C, chloroplastic                        |
