# Supplementary material for: Overexpression of HvIcy6 in Barley Enhances Resistance against Tetranychus urticae and Entails Partial Transcriptomic Reprogramming
Source: MDPI journal article supplement (doi:10.3390/ijms19030697), 2018-03-01
Supplement: s1 [file s1]

**Table S2.** List of the significant results ( $p < 0.01$ ) obtained from the enrichment gene ontology (GO) analysis of the DEGs. Only categories with more than five annotated genes are considered.

| Total DEGs (Biological process)          |            |                                                  |           |             |          |               |
|------------------------------------------|------------|--------------------------------------------------|-----------|-------------|----------|---------------|
|                                          | GO.ID      | Term                                             | Annotated | Significant | Expected | classicFisher |
| 1                                        | GO:0010468 | regulation of gene expression                    | 1025      | 9           | 3.52     | 0.0071        |
| 2                                        | GO:0060255 | regulation of macromolecule metabolic process    | 1057      | 9           | 3.63     | 0.0086        |
| 3                                        | GO:0019222 | regulation of metabolic process                  | 1076      | 9           | 3.69     | 0.0096        |
| Up-regulated DEGs (Biological process)   |            |                                                  |           |             |          |               |
|                                          | GO.ID      | Term                                             | Annotated | Significant | Expected | classicFisher |
| 1                                        | GO:0019438 | aromatic compound biosynthetic process           | 1389      | 9           | 3.66     | 0.008         |
| 2                                        | GO:0018130 | heterocycle biosynthetic process                 | 1407      | 9           | 3.71     | 0.0087        |
| Total DEGs (Molecular function)          |            |                                                  |           |             |          |               |
|                                          | GO.ID      | Term                                             | Annotated | Significant | Expected | classicFisher |
| 1                                        | GO:0001071 | nucleic acid binding transcription factor        | 513       | 7           | 1.93     | 0.0031        |
| 2                                        | GO:0003700 | transcription factor activity, sequence-specific | 513       | 7           | 1.93     | 0.0031        |
| 3                                        | GO:0008378 | galactosyltransferase activity                   | 30        | 2           | 0.11     | 0.0057        |
| Up-regulated DEGs (Molecular function)   |            |                                                  |           |             |          |               |
|                                          | GO.ID      | Term                                             | Annotated | Significant | Expected | classicFisher |
| 2                                        | GO:0001071 | nucleic acid binding transcription factor        | 513       | 6           | 1.52     | 0.004         |
| 3                                        | GO:0003700 | transcription factor activity, sequence-specific | 513       | 6           | 1.52     | 0.004         |
| Down-regulated DEGs (Molecular function) |            |                                                  |           |             |          |               |
|                                          | GO.ID      | Term                                             | Annotated | Significant | Expected | classicFisher |
| 1                                        | GO:0000287 | magnesium ion binding                            | 128       | 2           | 0.1      | 0.0045        |
| 2                                        | GO:0005337 | nucleoside transmembrane transporter activity    | 7         | 1           | 0.01     | 0.0055        |
| 3                                        | GO:0015932 | nucleobase-containing compound transmembrane     | 7         | 1           | 0.01     | 0.0055        |
| 4                                        | GO:1901505 | carbohydrate derivative transporter activity     | 12        | 1           | 0.01     | 0.0095        |
