# Supplementary material for: Overexpression of HvIcy6 in Barley Enhances Resistance against Tetranychus urticae and Entails Partial Transcriptomic Reprogramming
Source: MDPI journal article supplement (doi:10.3390/ijms19030697), 2018-03-01
Supplement: s1 [file s1]

**Table S3.** Primer sequences used for gene amplification by RT-qPCR assays.

| Gene ID              | Description        | Primer name     | Sequence (5' → 3')     |
|----------------------|--------------------|-----------------|------------------------|
| <i>Hv1Hr1G004150</i> | <i>HvIcy6</i>      | Hv1Hr1G004150-F | TCAAGGACATGCCTGAAGTG   |
|                      |                    | Hv1Hr1G004150-R | CGACAGTGTCAACGAGGATG   |
| <i>Hv6Hr1G012570</i> | <i>Cyclophilin</i> | Hv6Hr1G012570-F | TCCACCGGAGAGGAAGTACAGT |
|                      |                    | Hv6Hr1G012570-R | AATGTGCTCAGAGATGCAAGGA |
| <i>tetur18g03590</i> | <i>TuRP49</i>      | tetur18g03590-F | CTTCAAGCGGCATCAGAGC    |
|                      |                    | tetur18g03590-R | CGCATCTGACCCTTGA ACTTC |
