# Supplementary material for: Overexpression of HvIcy6 in Barley Enhances Resistance against Tetranychus urticae and Entails Partial Transcriptomic Reprogramming
Source: Int J Mol Sci. 2018 Mar 1;19(3):697. doi: 10.3390/ijms19030697 (PMC5877558; doi:10.3390/ijms19030697)
Supplement: Supplementary file 1 [file ijms-19-00697-s001.zip]

Archive with 4 entries (4 files):
- Table S2.pdf
- Table S3.pdf
- Figure S1.pdf
- Table S1.pdf
